# Supplementary material for: Magnetic nanoparticles entrapped in the cross-linked poly(imidazole/imidazolium) immobilized Cu(ii): an effective heterogeneous copper catalyst
Source: Royal Society of Chemistry journal article supplement (doi:10.1039/c4ra07817a), 2014-01-01

# Supplementary Data

## Magnetic Nanoparticle Entrapped into the Cross-linked Poly(imidazole/imidazolium) Immobilized Cu(II): An Effective Heterogeneous Copper Catalyst

Ali Pourjavadi,<sup>\*a</sup> Seyed Hassan Hosseini,<sup>a</sup> and Nasrin Zohreh<sup>b</sup>, Craig Bennett<sup>c</sup>

<sup>a</sup> Polymer Research Laboratory, Department of Chemistry, Sharif University of Technology, Tehran, Iran

<sup>b</sup> Department of chemistry, Faculty of Science, University of Qom, P. O. Box: 37185-359, Qom, Iran

<sup>c</sup> Department of Physics, Acadia University, Wolfville, Nova Scotia, Canada

(E-mail address: purjavad@sharif.edu; Phone/fax: (982)166165311)

|                                                                                                  |   |
|--------------------------------------------------------------------------------------------------|---|
| <b>Fig. S1.</b> TEM image of recycled catalyst .....                                             | 2 |
| <b>Fig. S2.</b> <sup>1</sup> H NMR of 1,4-butanediyl-3,3'-bis-1-vinylimidazolium dibromide.....  | 3 |
| <b>Fig. S3.</b> <sup>1</sup> H NMR of cross-linker [BBVim][BF <sub>4</sub> ] <sub>2</sub> .....  | 3 |
| <b>Fig. S4.</b> <sup>19</sup> F NMR of cross-linker [BBVim][BF <sub>4</sub> ] <sub>2</sub> ..... | 4 |
| <b>Fig. S5.</b> <sup>1</sup> H NMR of monomer [EVim][BF <sub>4</sub> ] .....                     | 4 |
| <b>Fig. S6.</b> <sup>19</sup> F NMR of monomer [EVim][BF <sub>4</sub> ] .....                    | 5 |
| <sup>1</sup> H NMR and <sup>13</sup> C NMR of triazole products .....                            | 6 |

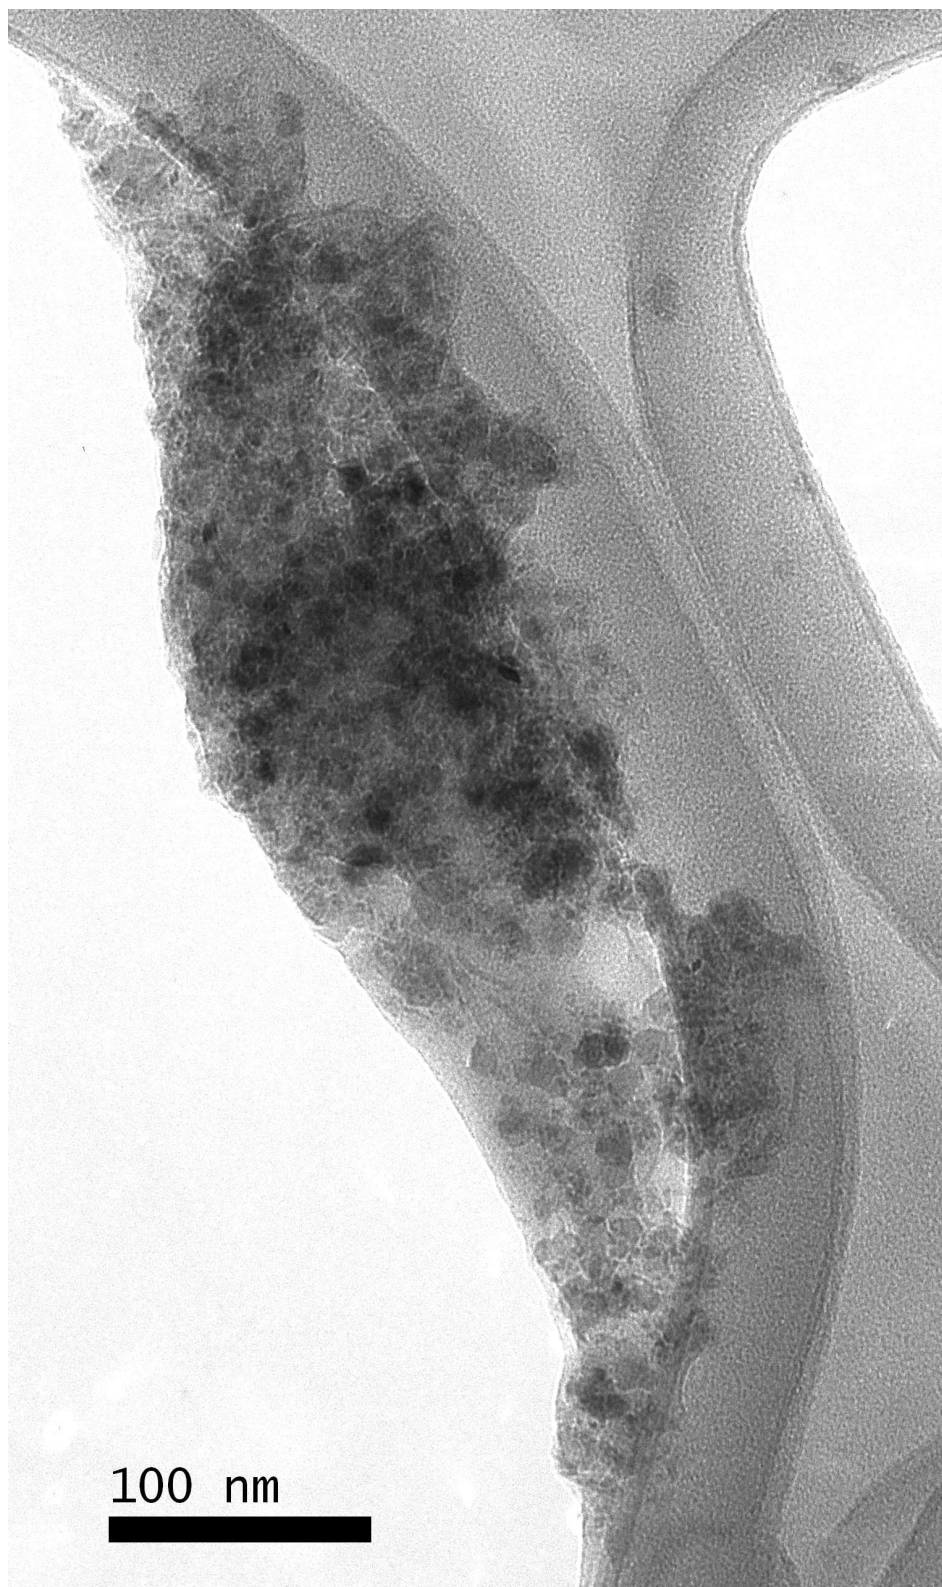

**Fig. S1.** TEM image of recycled catalyst

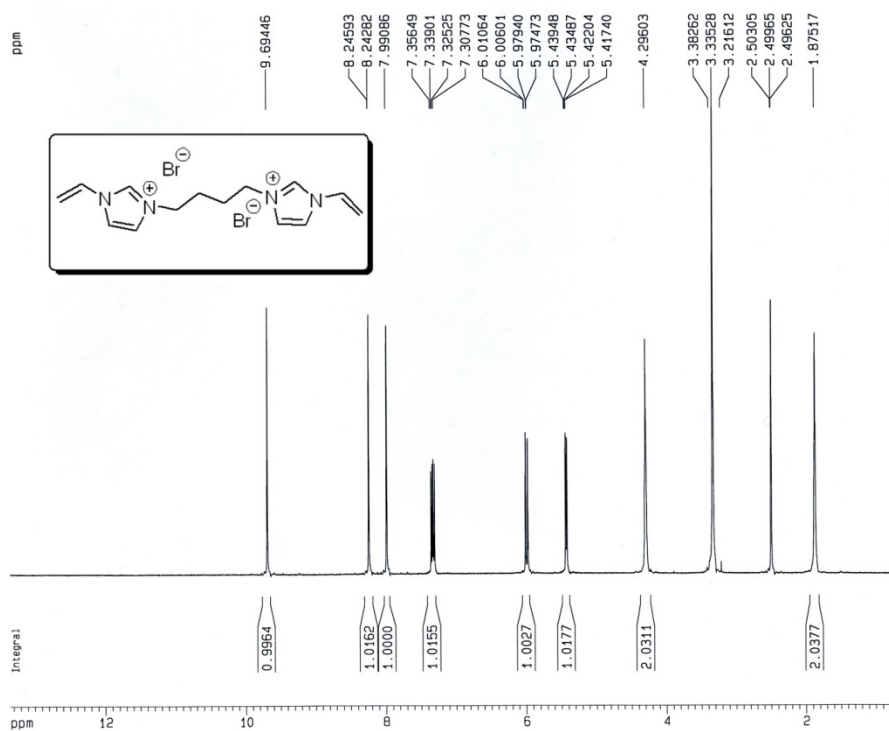

**Fig. S2.**  $^1\text{H}$  NMR of 1,4-butanediyl-3,3'-bis-1-vinylimidazolium dibromide

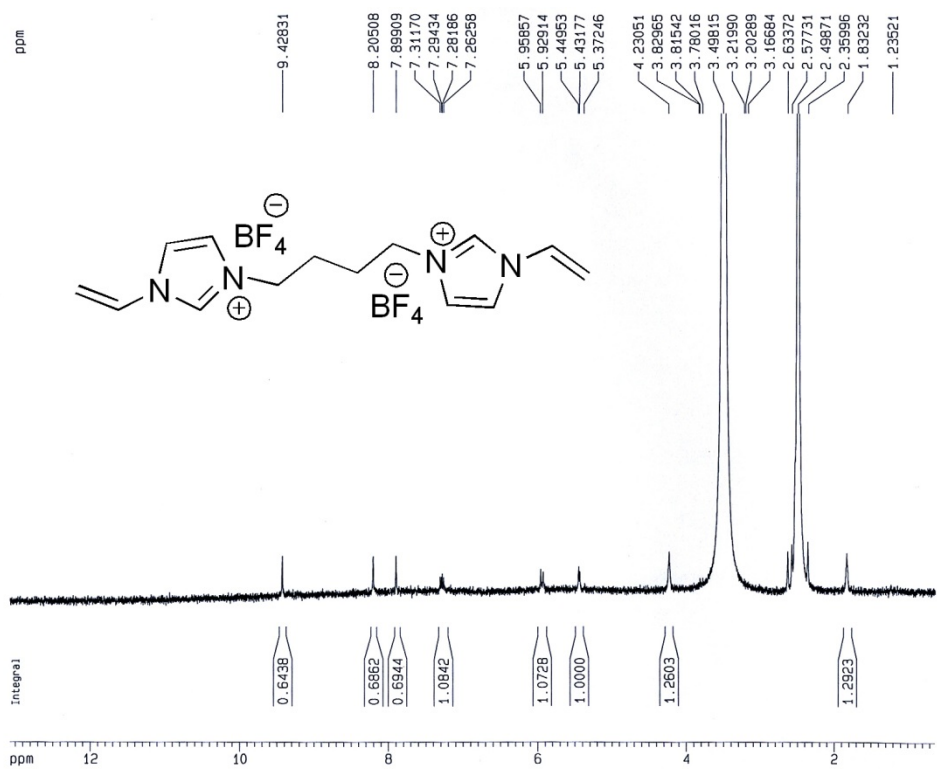

**Fig. S3.**  $^1\text{H}$  NMR of cross-linker  $[\text{BBVim}][\text{BF}_4]_2$

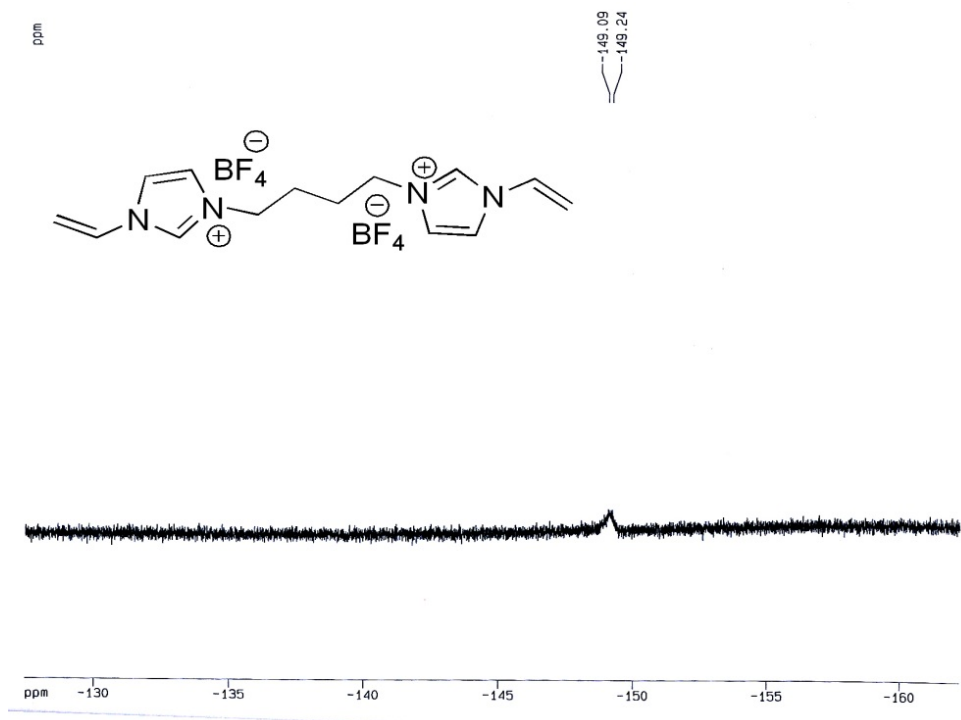

Fig. S4. <sup>19</sup>F NMR of cross-linker [BBVim][BF<sub>4</sub>]<sub>2</sub>

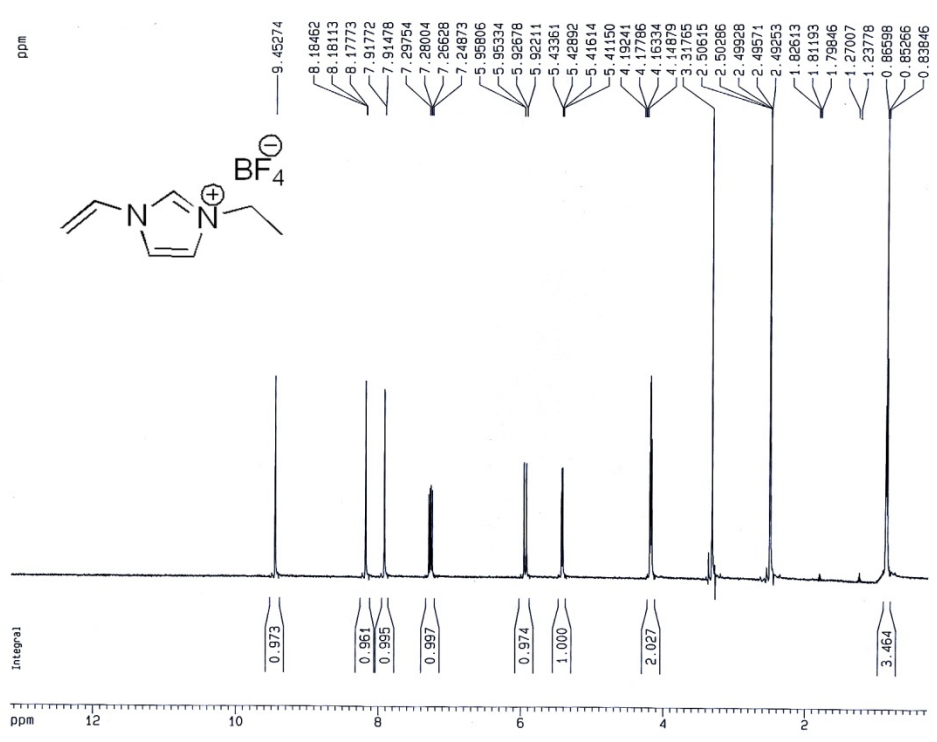

Fig. S5. <sup>1</sup>H NMR of monomer [EVim][BF<sub>4</sub>]

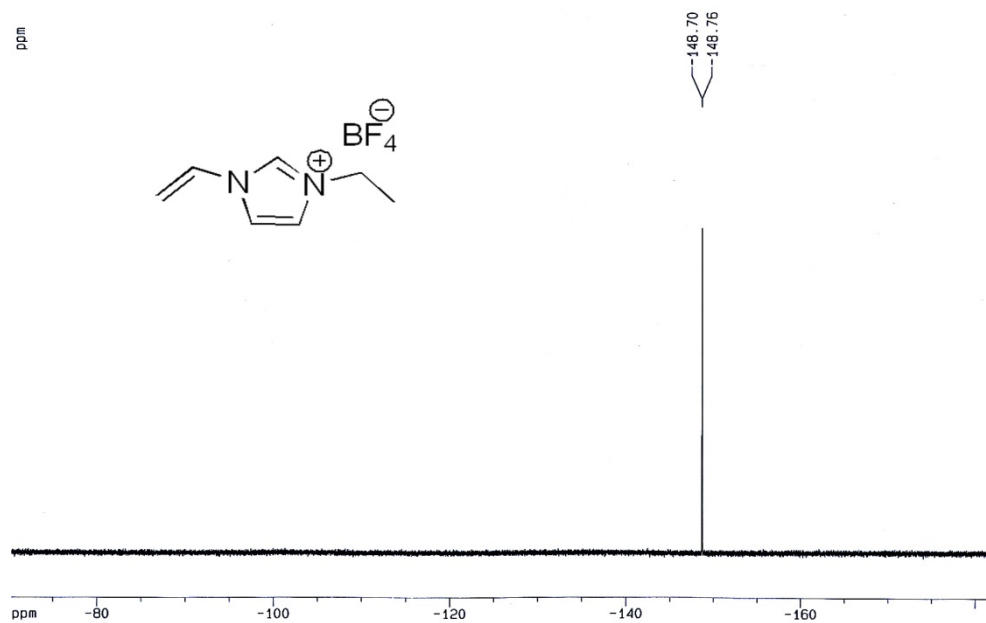

**Fig. S6.** <sup>19</sup>F NMR of monomer [EVim][BF<sub>4</sub>]

### 1-Phenyl-2-(4-phenyl-1H-1,2,3-triazol-1-yl)ethanone:

Colourless solid;  $^1\text{H NMR}$  (400 MHz,  $\text{CDCl}_3$ )  $\delta$  5.93 (s, 2H), 7.36-7.90 (m, 6H), 8.01 (d,  $J = 7.2$  Hz, 2H); 8.04 (s, 1H); 8.06 (d,  $J = 7.2$  Hz, 2H);  $^{13}\text{C NMR}$  (100 MHz,  $\text{CDCl}_3$ )  $\delta$  55.4, 121.4, 125.8, 128.2, 128.8, 129.2, 130.5, 133.9, 134.6, 148.2, 190.2

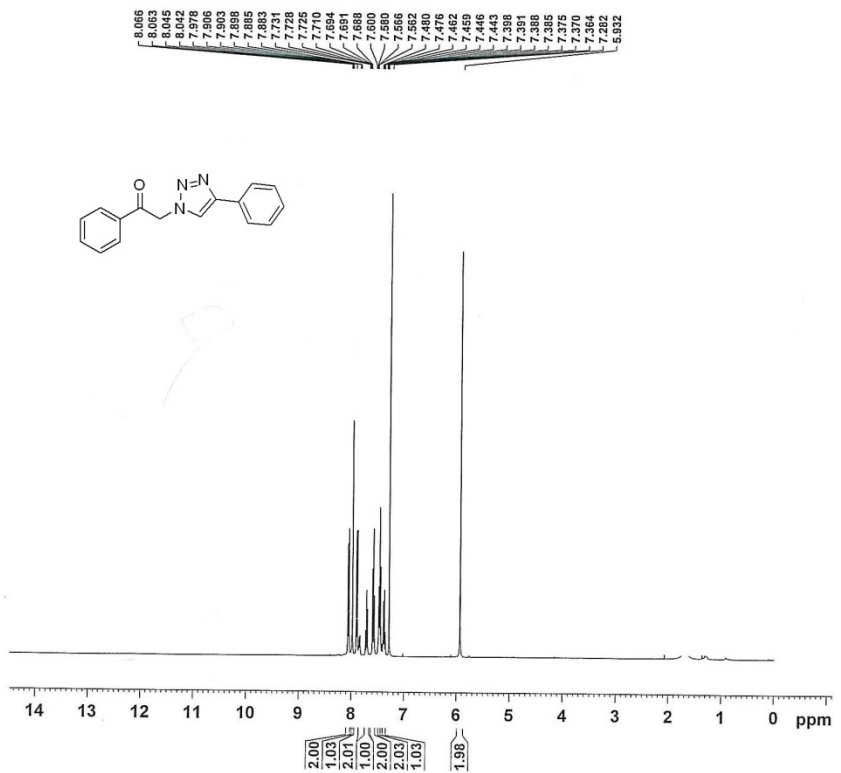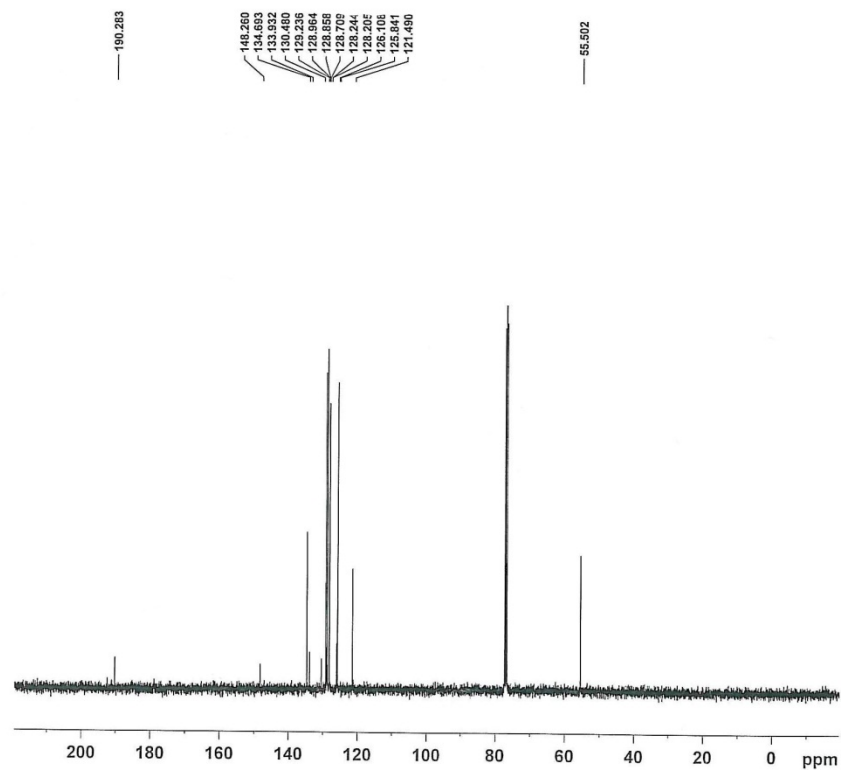

**4-Phenyl-1,2,3-triazole-1-yl)-acetic acid ethyl ester:**

$^1\text{H NMR}$  (400 MHz,  $\text{CDCl}_3$ )  $\delta$ : 1.33 (3H, t,  $J=7.6$  Hz), 4.26 (2H, q,  $J=7.6$

Hz), 5.20 (2H, s), 7.34-7.46 (3H, m), 7.85-7.87 (2H, m, ortho to Ar), 7.93 (1H, s);

$^{13}\text{C NMR}$  (100MHz,  $\text{CDCl}_3$ )  $\delta$ : 14.0, 50.9, 62.4, 121.0, 125.8, 128.3, 128.8, 130.3, 148.2, 166.3;

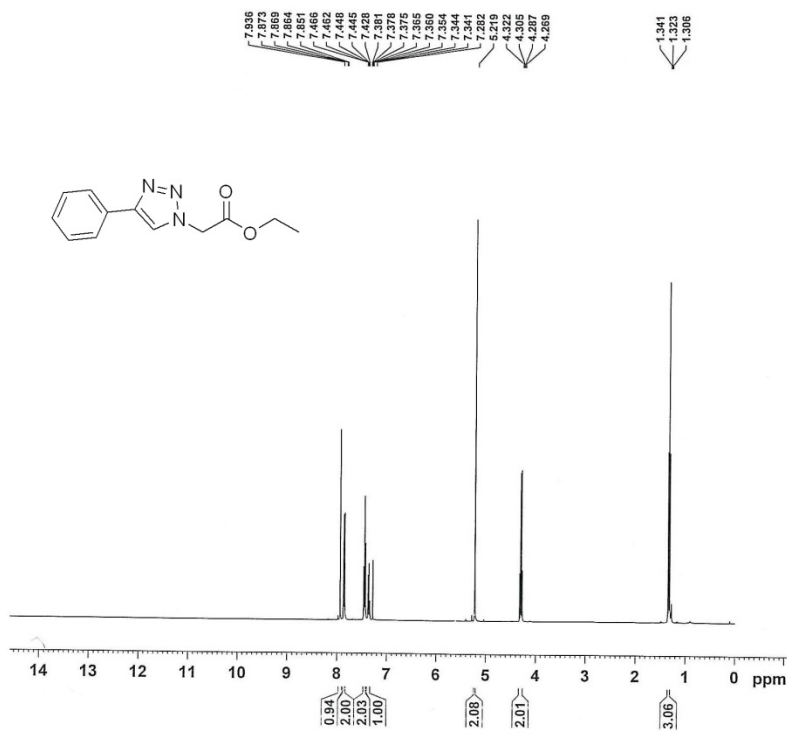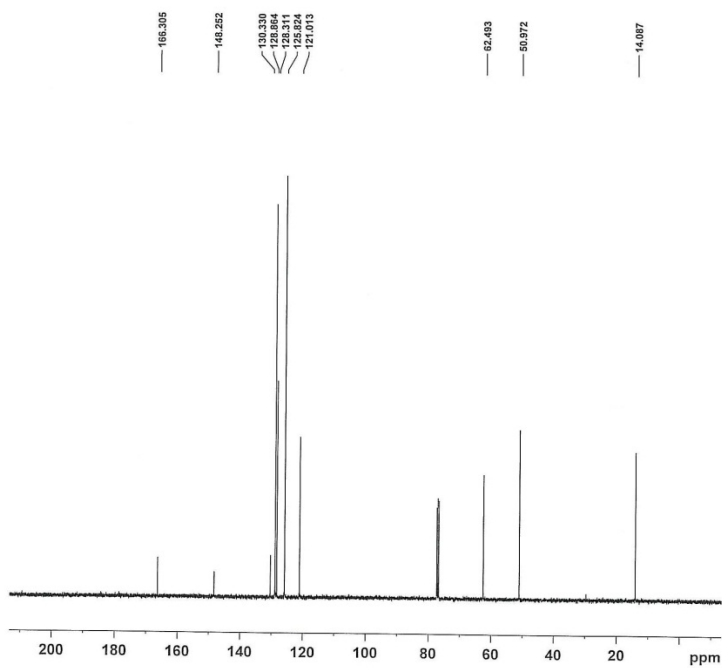

**1-(4-bromobenzyl)-4-phenyl-1*H*-1,2,3-triazole:**

$^1\text{H}$  NMR (400 MHz,  $\text{CDCl}_3$ )  $\delta$  = 5.69 (2H, s), 7.31-7.36 (1H, m), 7.40-7.44 (4H, m), 7.76 (s, 1 H), 7.81 (2H, d,  $J$  = 6.8 Hz), 8.22 (2H, d,  $J$  = 6.8 Hz);  $^{13}\text{C}$  NMR (100 MHz,  $\text{CDCl}_3$ ) 53.1, 119.7, 124.0, 124.2, 125.7, 128.4, 128.5, 128.8, 130.0, 141.7, 148.0, 148.6;

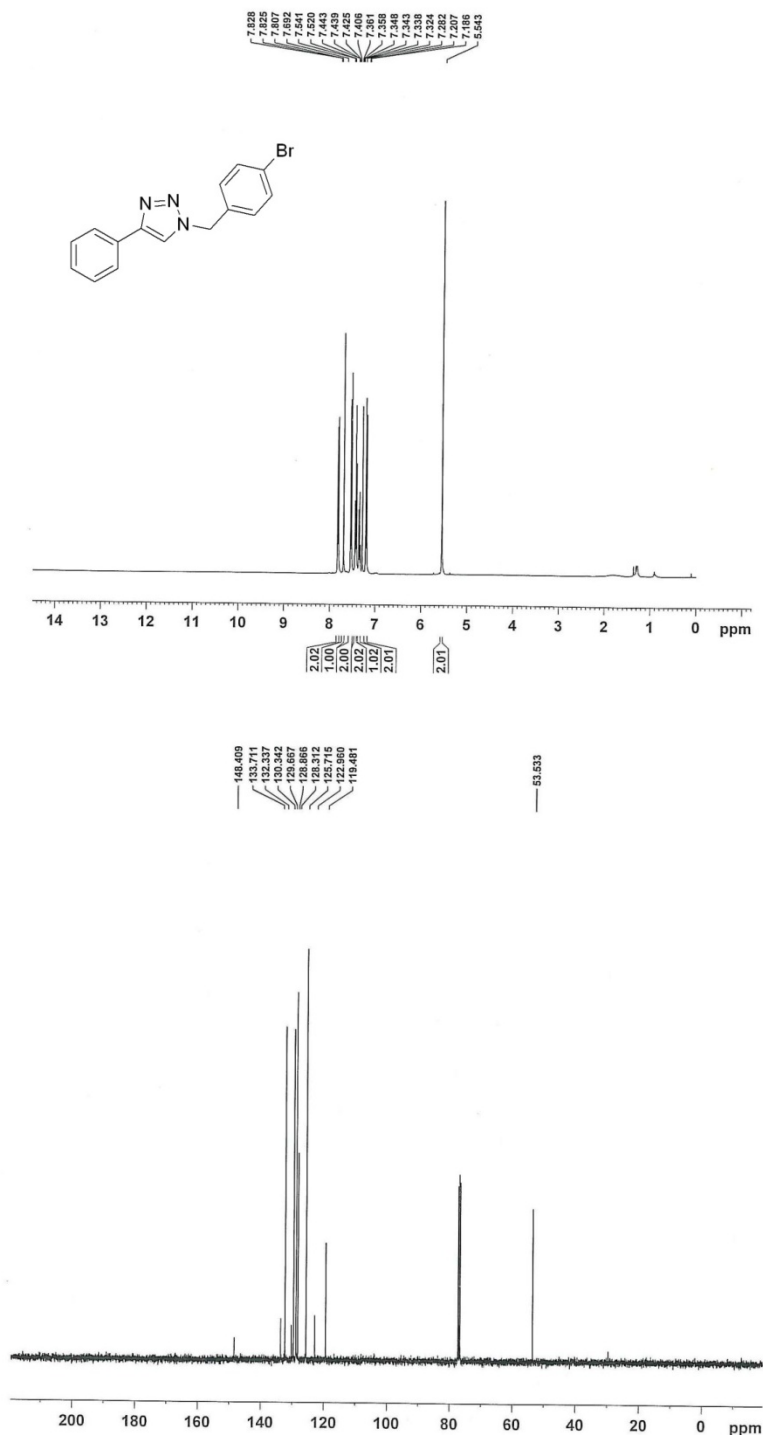



### 1-allyl-4-pentyl-1H-1,2,3-triazole:

$^1\text{H NMR}$  (400 MHz,  $\text{CDCl}_3$ )  $\delta$  = 1.28 (3H, t), 1.32-1.37 (2H, m), 1.35-1.36 (4H, m), 1.67 (2H, t), 2.27 (2H, t), 4.92 (2H, d), 5.26-5.36 (2H, m), 5.97-6.05 (1H, m), 7.46 (1H, s);

$^{13}\text{CNMR}$  (100 MHz,  $\text{CDCl}_3$ ) : 13.8, 22.4, 25.6, 29.6, 30.9, 31.4, 119.7, 120.4, 130.0, 148.7

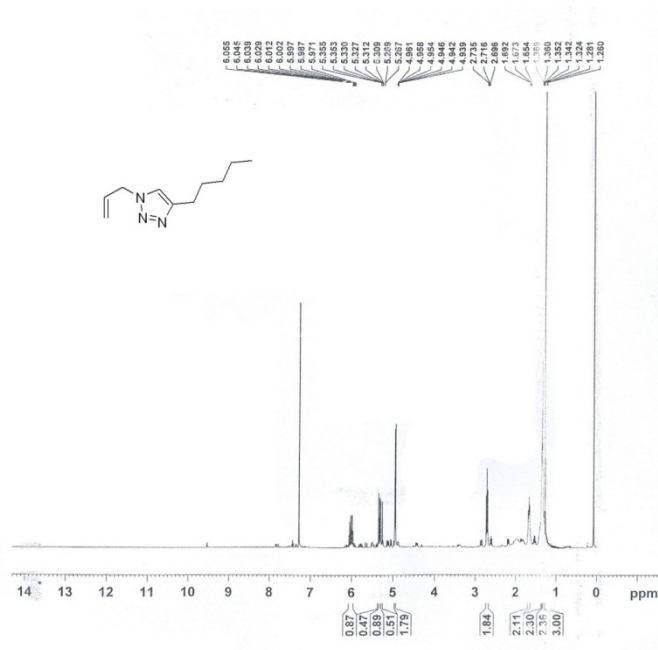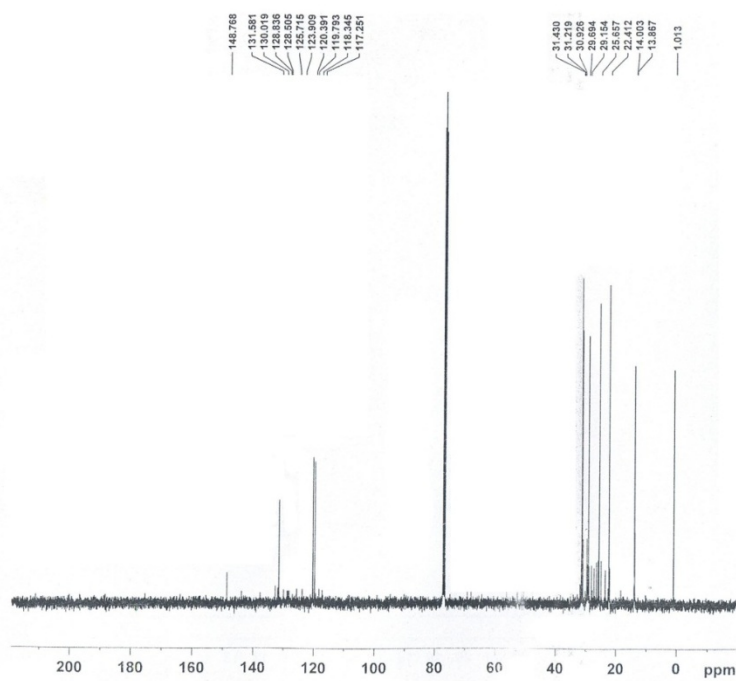

**4-Phenyl-1,2,3-triazole-1-yl)-acetic acid ethyl ester:**

White solid, mp 102-104°C;

<sup>1</sup>H NMR (400 MHz, CDCl<sub>3</sub>) δ: 1.62 (2H, broad), 5.93 (2H, s), 7.28 (1H, s), 7.40-7.40 (2H, m), 7.83-7.99 (3H, m, ortho to Ar)

<sup>13</sup>C NMR (100 MHz, CDCl<sub>3</sub>) δ: 29.70, 109.64, 115.73, 118.78, 126.11, 128.98, 144.50, 185.11;

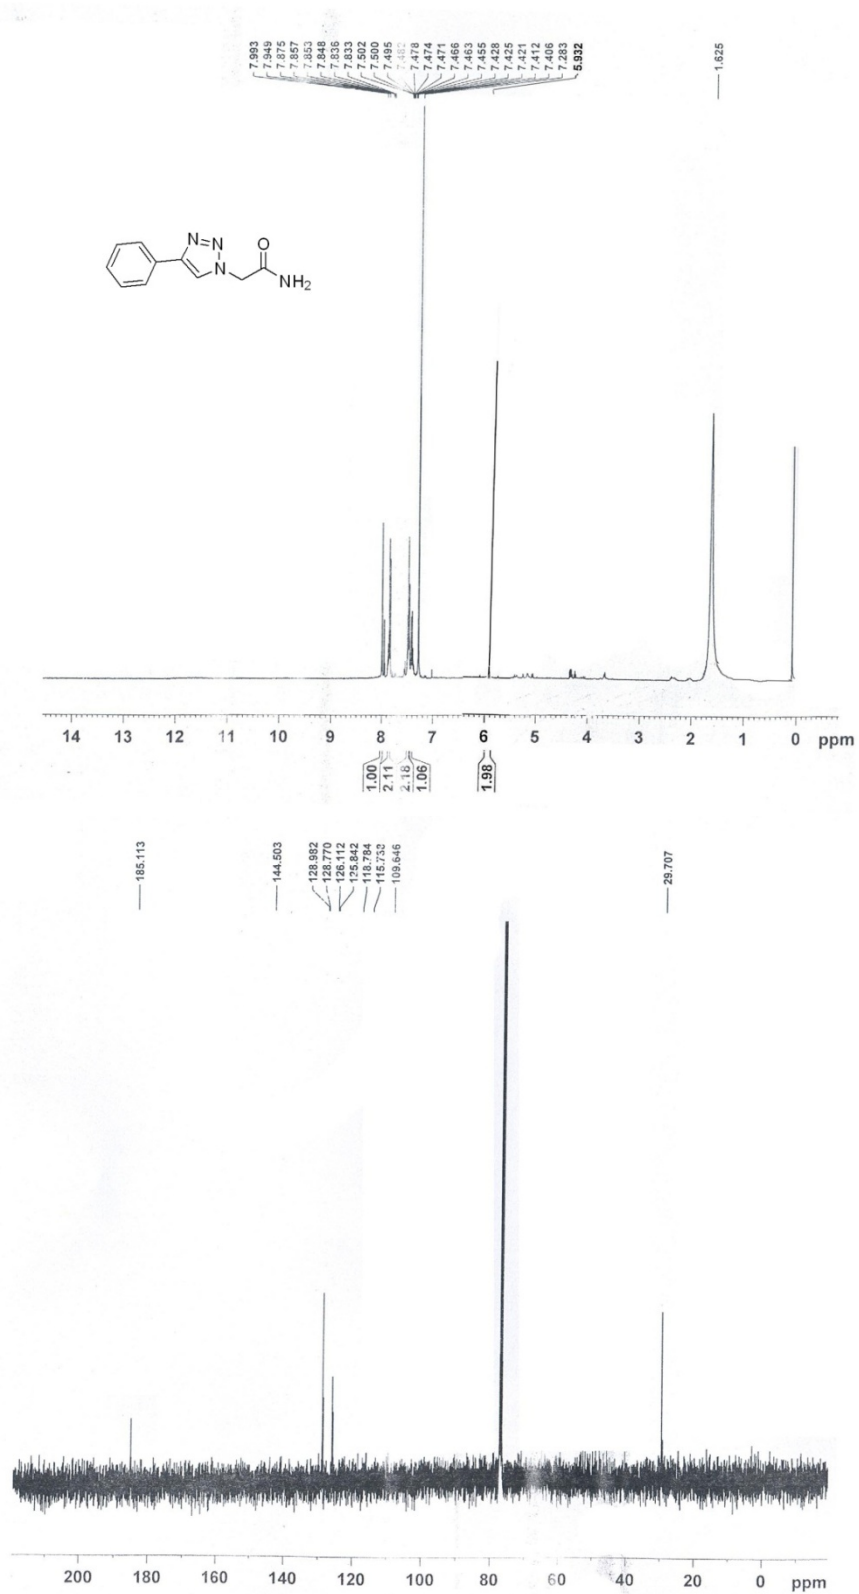

**1-Benzyl-4-pentyl-1*H*-1,2,3-triazole:**  $^1\text{H}$  NMR (400 MHz,  $\text{CDCl}_3$ )  $\delta$  = 0.85 (3H, t,  $J$  = 6.9 Hz), 1.27-1.30 (4 H, m), 1.59-1.63 (2H, m), 2.65 (2H, t,  $J$  = 7.4 Hz), 5.41 (2H, s), 7.09 (2H, d,  $J$  = 6.3 Hz), 7.21 (1H, s), 7.46 (2H, d,  $J$  = 6.3 Hz);  $^{13}\text{C}$  NMR (100 MHz,  $\text{CDCl}_3$ ) 13.9, 22.3, 25.6, 29.0, 13.9, 22.3, 25.6, 29.0, 31.4, 53.2, 120.5, 122.6, 129.5, 132.1, 134.0;

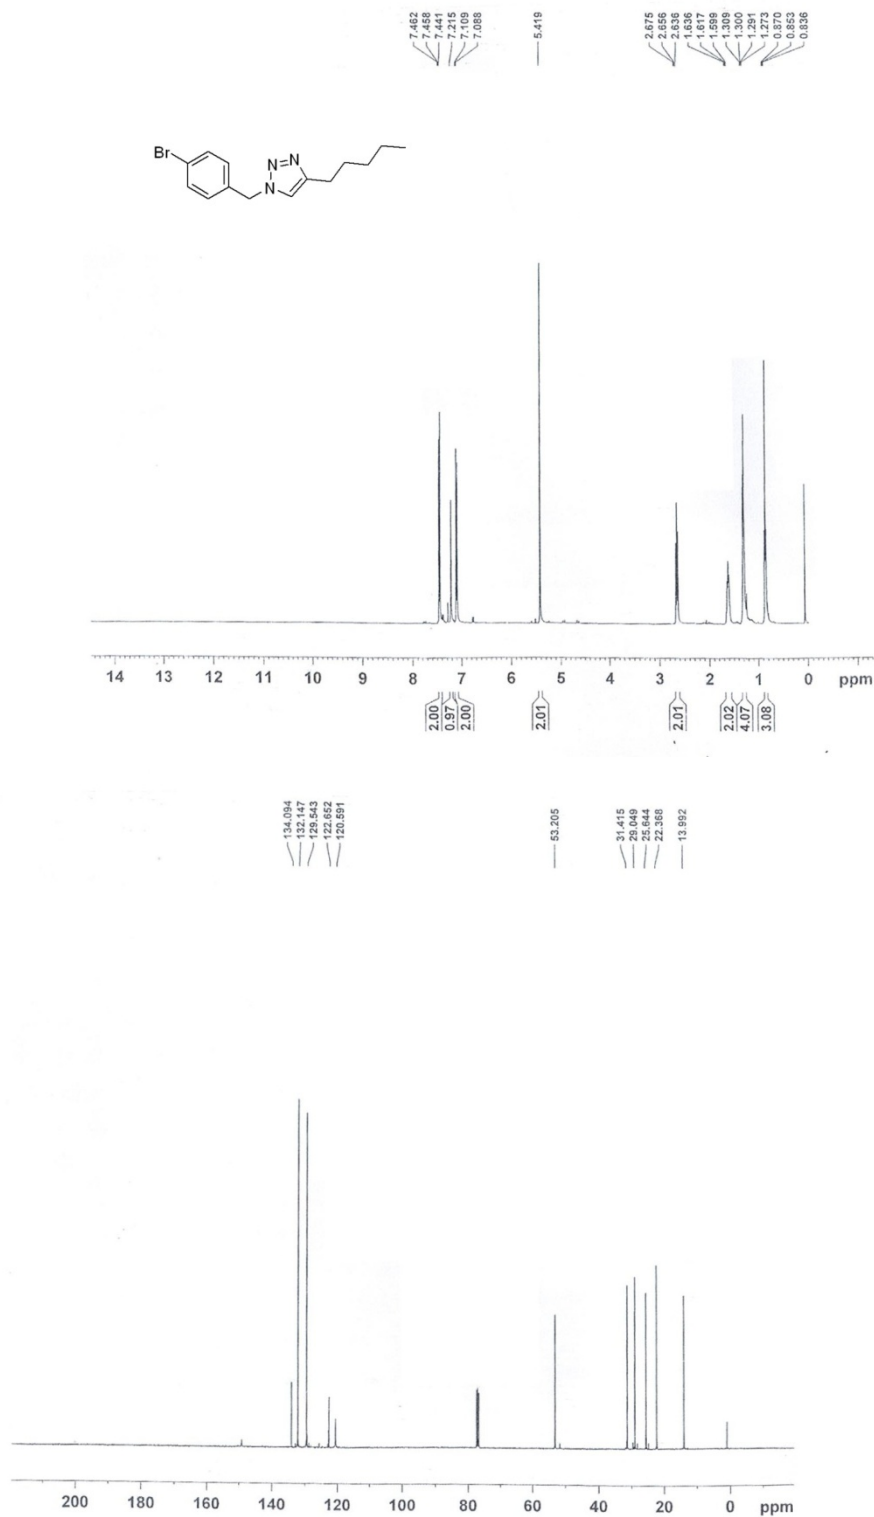

### 1-Benzyl-4-pentyl-1H-1,2,3-triazole:

$^1\text{H}$  NMR (400 MHz,  $\text{CDCl}_3$ )  $\delta$  = 0.87 (3H, t,  $J$  = 6.9 Hz), 1.29-1.33 (4H, m), 1.61-1.65 (2H, m), 2.67 (2H, t,  $J$  = 7.4 Hz), 5.49 (2H, s), 7.17 (1H, s), 7.25 (2H, d,  $J$  = 8.0 Hz), 7.34-7.38 (3H, m);  $^{13}\text{C}$  NMR (100 MHz,  $\text{CDCl}_3$ ) 13.9, 22.3, 25.6, 29.0, 31.4, 53.9, 120.4, 127.9, 128.5, 129.0, 135.0, 148.9;

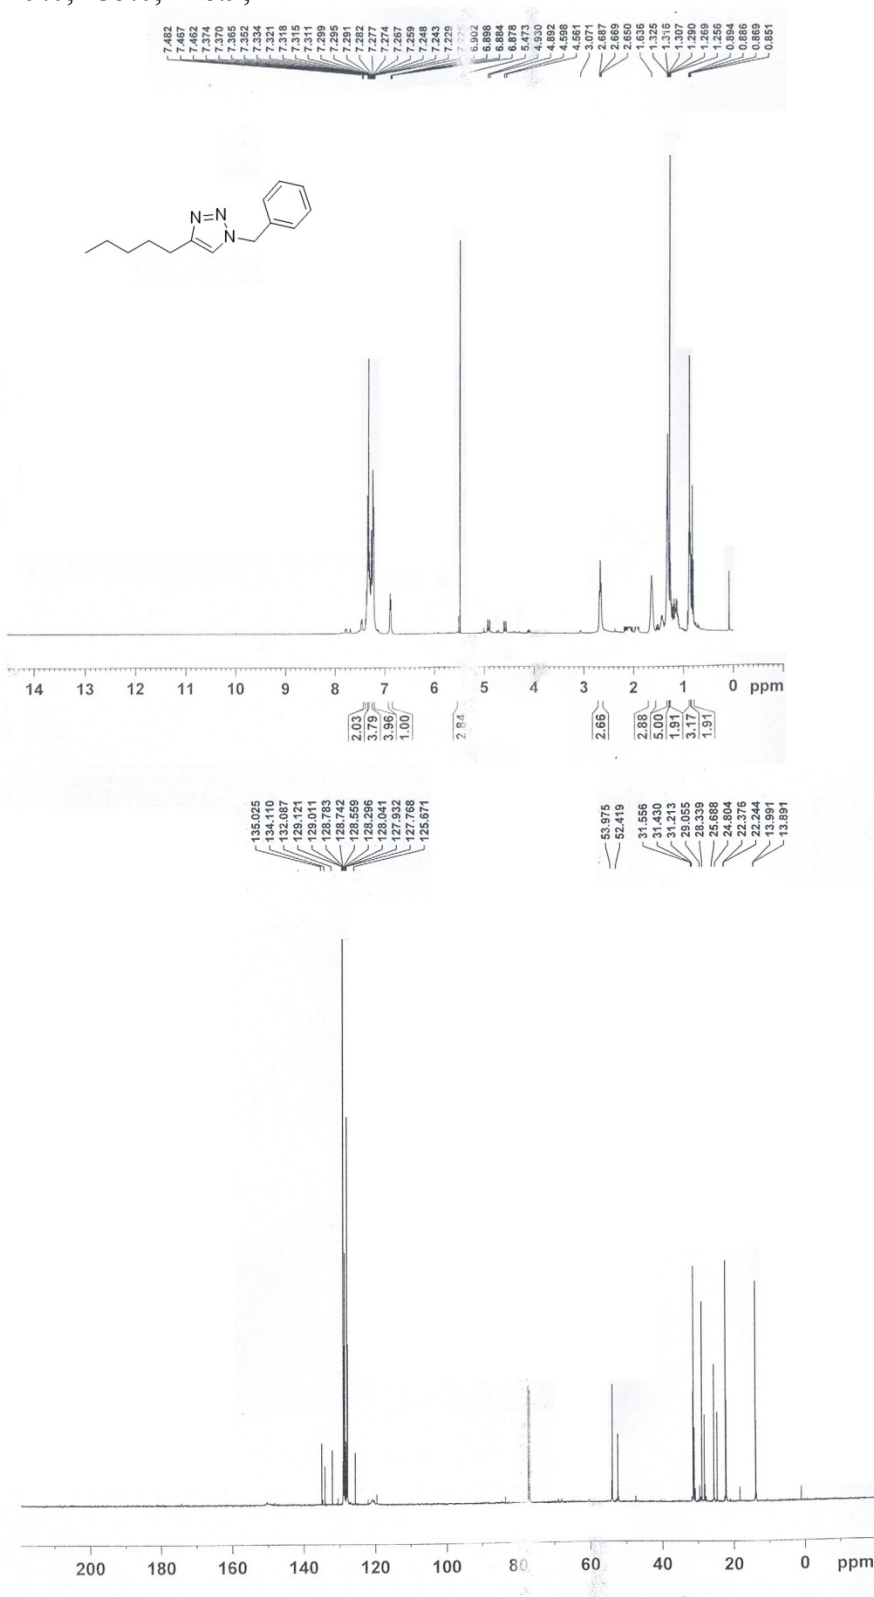

**1-(3-methylbut-2-en-1-yl)-4-phenyl-1H-1,2,3-triazole:**

$^1\text{H}$  NMR (400 MHz,  $\text{CDCl}_3$ )  $\delta$  = 1.81(6H, s), 4.97 (2H, d,  $J$ = 7.2Hz), 5.46 (1H, t,  $J$ = 7.2Hz), 7.28-7.36 (3H, m), 7.73 (1H, s), 7.82-7.85 (2H,m);  $^{13}\text{C}$  NMR (100 MHz,  $\text{CDCl}_3$ ) 18.1, 25.7, 48.1, 117.2, 119.2, 126.7, 128.1, 128.8, 139.9, 147.7

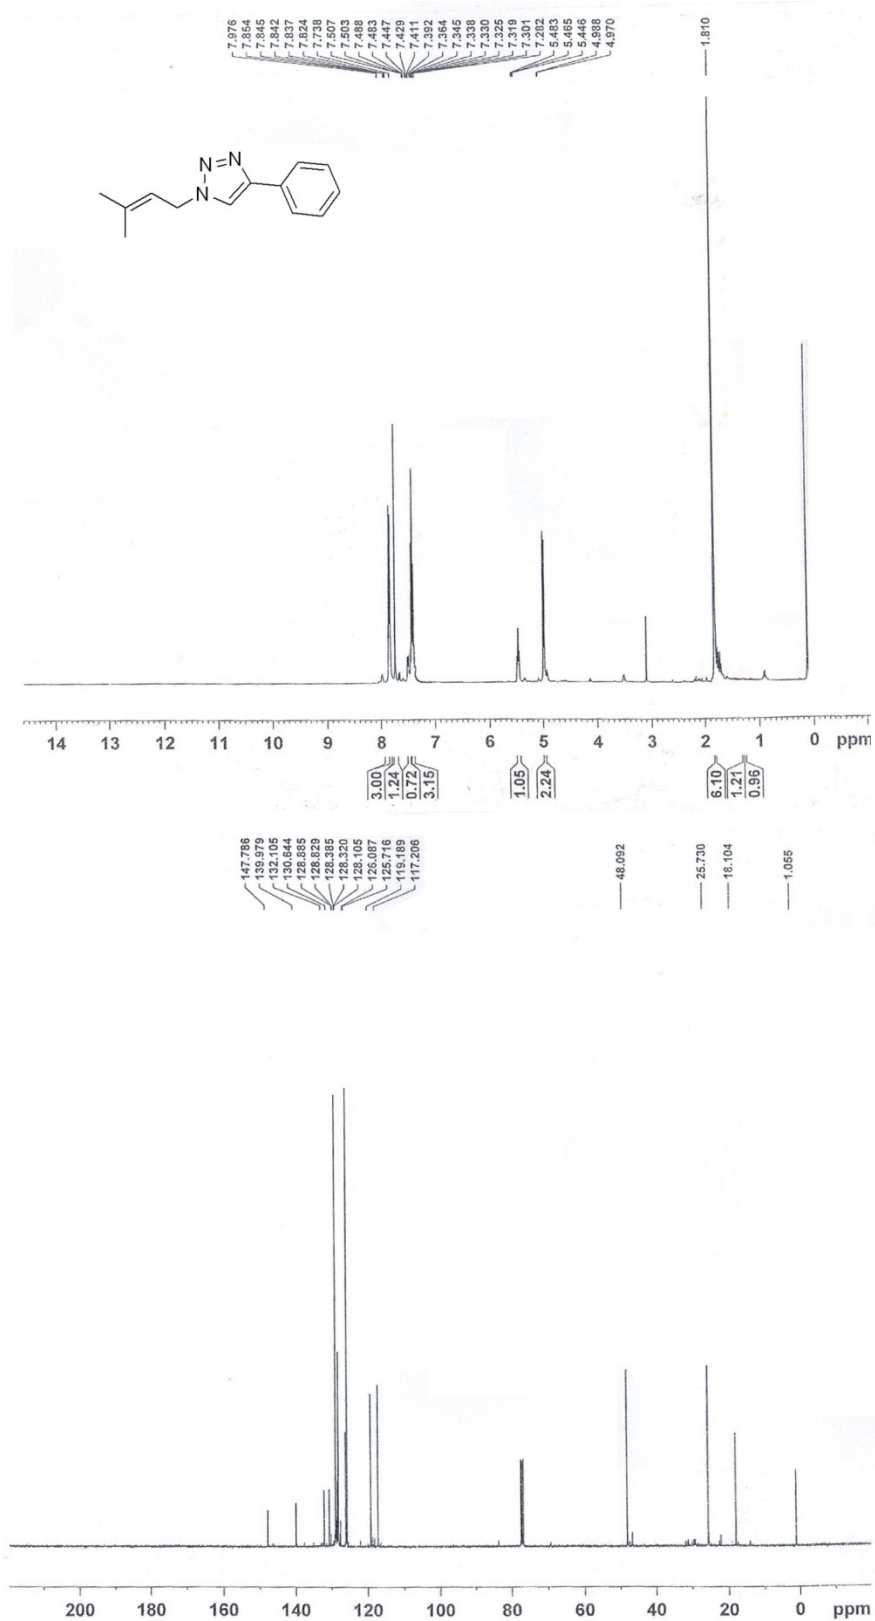

### 1-propyl-4-phenyl-1*H*-1,2,3-triazole:

White solid, mp 62-64°C, <sup>1</sup>H NMR (400 MHz, CDCl<sub>3</sub>) δ: 0.99 (3H, t, *J*= 7.3), 1.97-2.02 (2H, m), 4.37 (2H, t, *J*=7.3), 7.26-7.34 (1H, m, Ar), 7.42 (2H, t, Ar), 7.74 (1H, s), 7.83 (2H, d); <sup>13</sup>C NMR (100 MHz, CDCl<sub>3</sub>) δ: 11.5, 24.1, 51.9, 119.8, 126.1, 128.5, 129.2, 130.70, 147.61

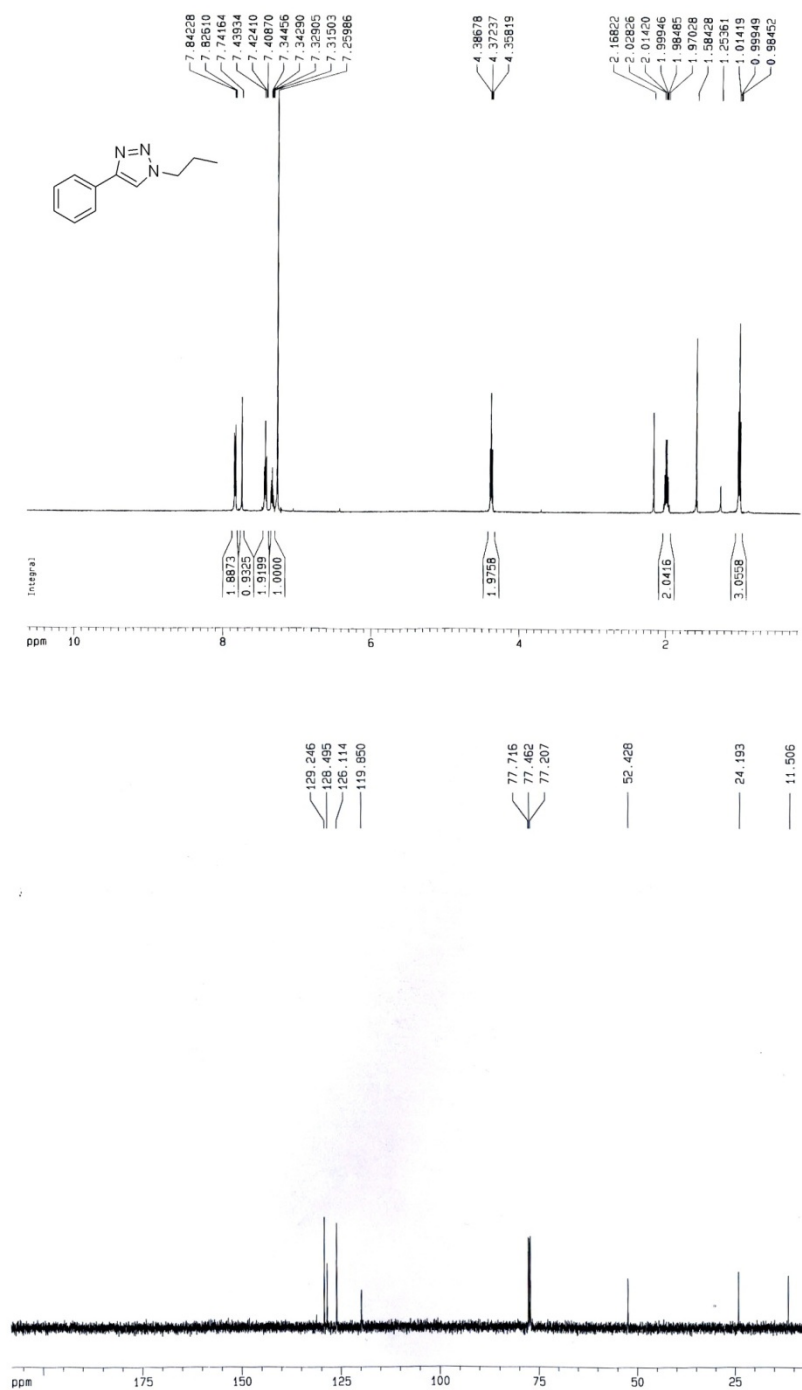

**1-(naphthalen-1-ylmethyl)-4-phenyl-1H-1,2,3-triazole:**  $^1\text{H}$  NMR (400 MHz,  $\text{CDCl}_3$ )  $\delta$  = 6.02 (2H, s), 7.25-7.26 (2H, m), 7.33-7.34 (2H, m), 7.47-7.53 (4H, m), 7.72-7.74 (2H, m), 7.90 (2H, d,  $J$  = 5.2), 8.00 (1H, d,  $J$  = 5.2);  $^{13}\text{C}$  NMR (100 MHz,  $\text{CDCl}_3$ ) 52.8, 119.8, 123.3, 125.7, 126.0, 126.8, 127.8, 128.3, 128.5, 129.1, 129.3, 130.2, 130.5, 130.9, 131.6, 134.3

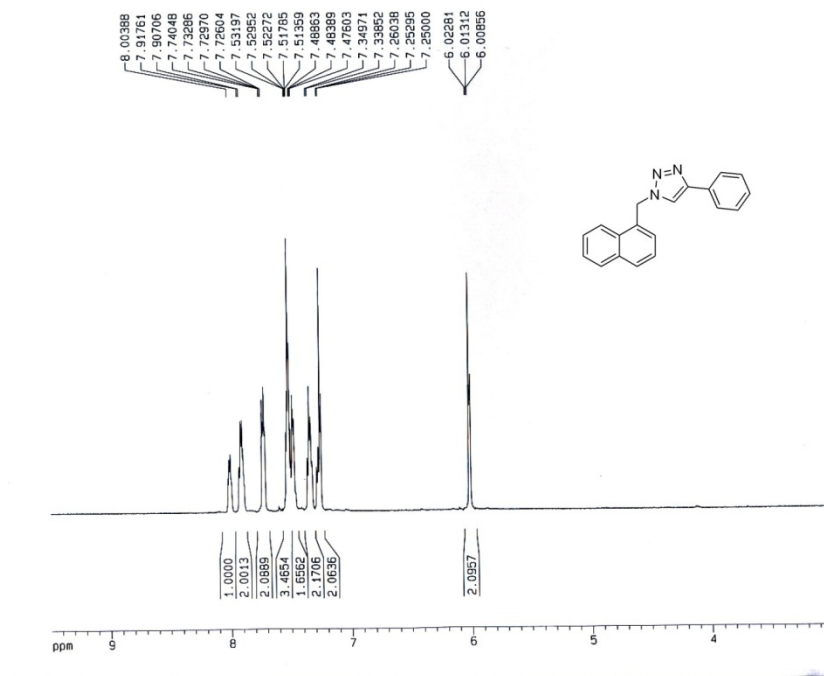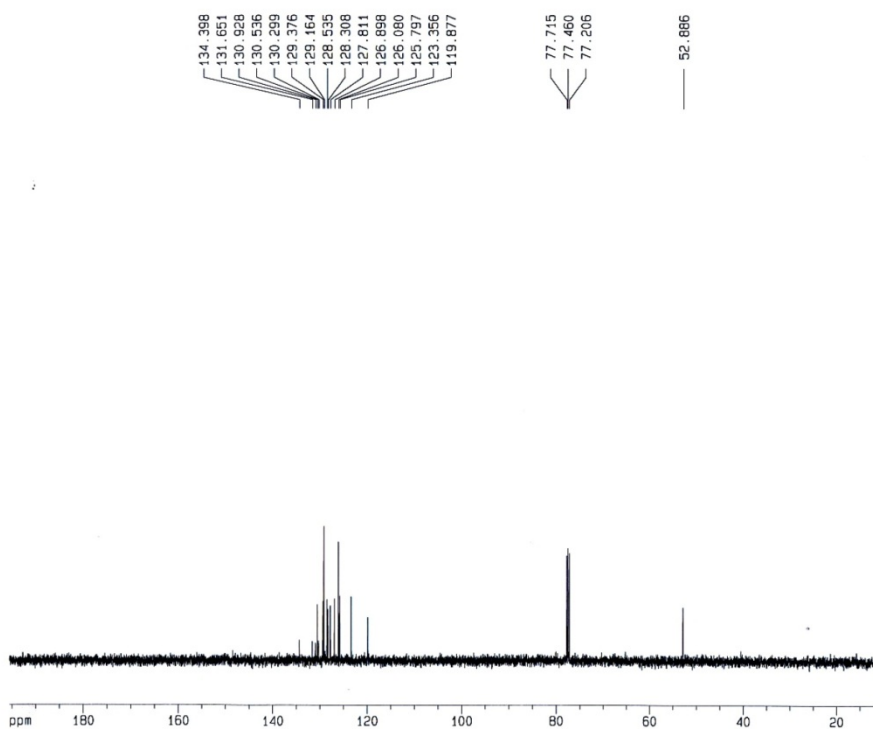

Supplement: c4ra07817a1.pdf [file c4ra07817a1.pdf]
